# Supplementary material
Source: HighWire-hosted journal article supplement (https://cmaj.ca/highwire/filestream/58083/field_highwire_adjunct_files/0/screen-gilbody-1-atONLINEonly.pdf)
Supplement: screen-gilbody-1-atONLINEonly.pdf [file screen-gilbody-1-atONLINEonly.pdf]

#### Appendix 1: MEDLINE search terms

1. Depression terms
2. exp Depressive Disorder/
3. DEPRESSION/
4. (depression\$ or depressed or depressive\$).ti,ab.
5. RCT terms
6. clinical trial.pt.
7. exp Randomized Controlled Trials/
8. Random Allocation/
9. Double-Blind Method/
10. Single-blind method/
11. exp Clinical Trials/ (95837)
12. clin\$ trial\$.ti,ab. (71318)
13. ((singl\$ or doubl\$ or trebl\$ or tripl\$) adj3 (blind\$ or mask\$)).ti,ab.
14. Placebos/
15. placebo\$.ti,ab.
16. random\$.ti,ab.
17. exp Research Design/
18. exp Evaluation Studies/
19. Follow-Up Studies/
20. Prospective Studies/
21. (control\$ or prospectiv\$ or volunteer\$).ti,ab.
22. Screening, case finding and assessment terms
23. "Health-Status-Indicators"
24. "Outcome-and-Process-Assessment-(Health-Care)"/ all subheadings
25. "Outcome-Assessment-(Health-Care)"/ all subheadings
26. "Quality-of-Life"/ all subheadings
27. "mass-screening"/all subheadings
28. "diagnosis"/all subheadings
29. (outcome measure\*) in ti,ab
30. (health outcome\*) in ti,ab
31. (quality of life) in ti,ab
32. measure\* in ti,ab
33. assess\* in ti,ab
34. screen\* in ti,ab
35. (score\* or scoring) in ti,ab
36. index in ti,ab
37. indices in ti,ab
38. scale\* in ti,ab
39. monitor\* in ti,ab
40. outcome\* in ti,ab
